# Supplementary material for: Rationally targeted anti-VISTA antibody that blockades the C-C’ loop region can reverse VISTA immune suppression and remodel the immune microenvironment to potently inhibit tumor growth in an Fc independent manner
Source: PubMed Central journal article supplement — J Immunother Cancer. 2022 Feb 7;10(2):e003382. doi: 10.1136/jitc-2021-003382 (PMC8823246; doi:10.1136/jitc-2021-003382), 2022-02-07

A

## Binding of V4P to B7-family proteins, PD-1 and CTLA-4

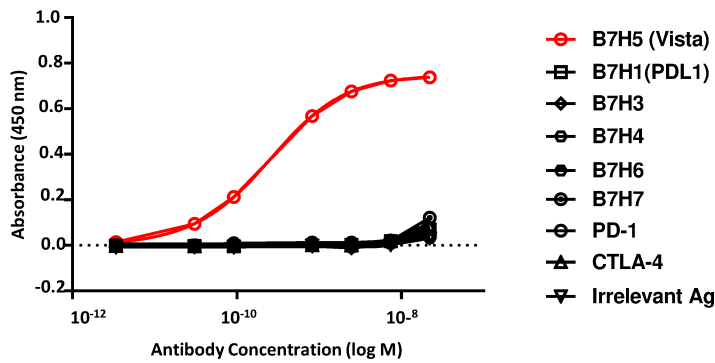

B

## Efficacy of Fc-competent V4P-mIgG2a vs Fc-silent V4P-mIgG2a-LALAPG in EL4 murine syngeneic CDX model

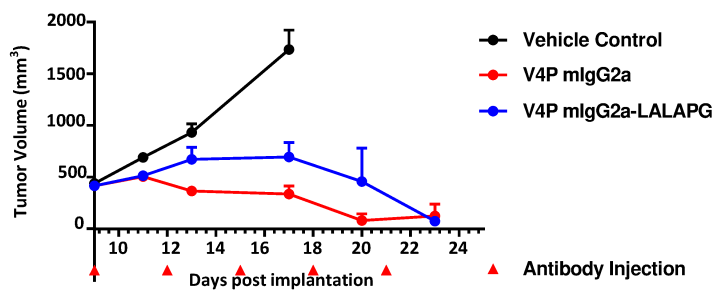

C

## Efficacy of Fc-competent V4P-mIgG2a vs Fc-silent V4P-mIgG2a-LALAPG in CT26 murine syngeneic CDX model

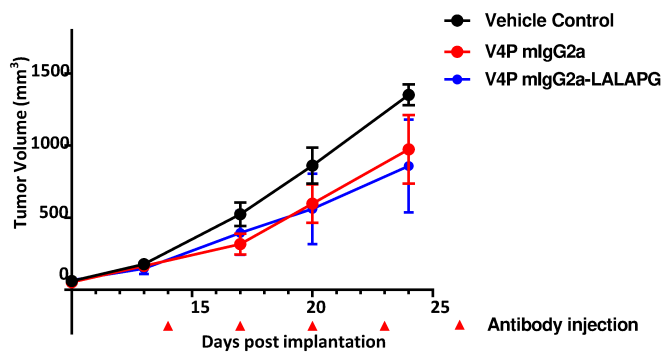

Supplement: jitc-2021-003382supp003.pdf [file jitc-2021-003382supp003.pdf]
