# Supplementary material for: Rationally targeted anti-VISTA antibody that blockades the C-C’ loop region can reverse VISTA immune suppression and remodel the immune microenvironment to potently inhibit tumor growth in an Fc independent manner
Source: PubMed Central journal article supplement — J Immunother Cancer. 2022 Feb 7;10(2):e003382. doi: 10.1136/jitc-2021-003382 (PMC8823246; doi:10.1136/jitc-2021-003382), 2022-02-07

**A Epitope Binning of HMBD-002 with other anti-human VISTA binding antibodies**

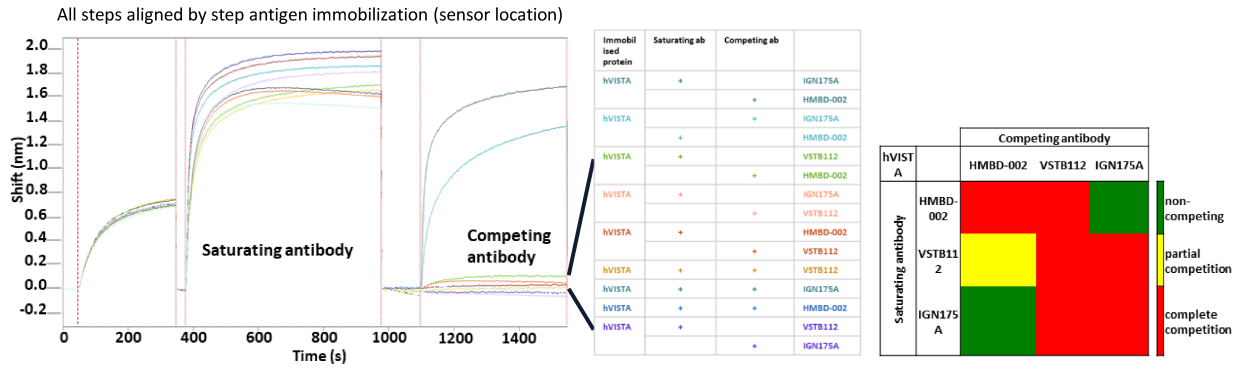

**B Epitope Binning of HMBD-002 with other anti-mouse VISTA binding antibodies**

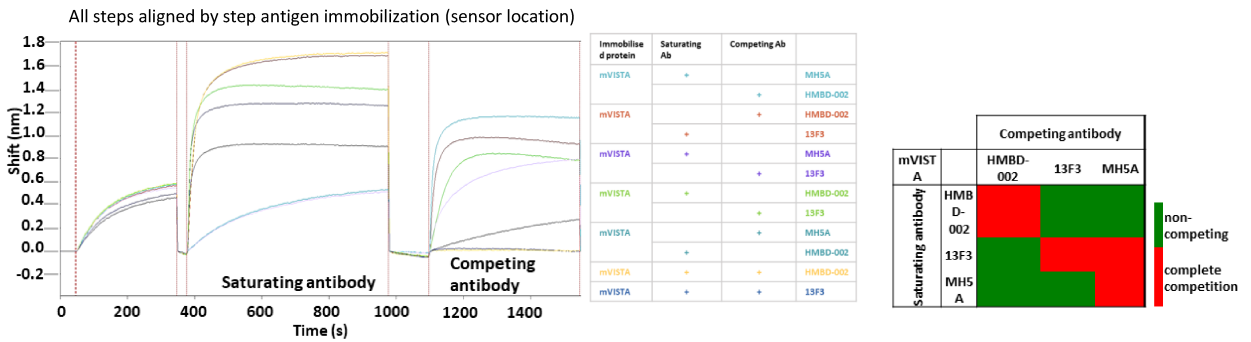

**C Affinity - Human VISTA**

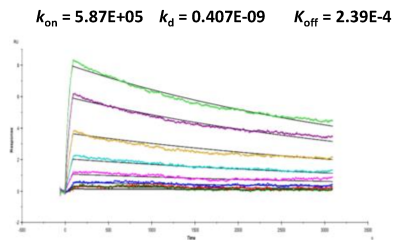

**D Affinity - NHP VISTA**

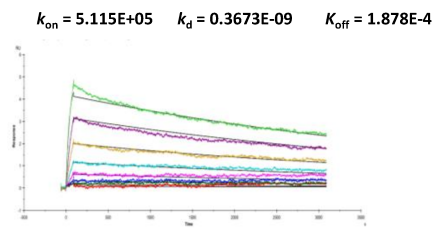

**E Affinity - Rat VISTA**

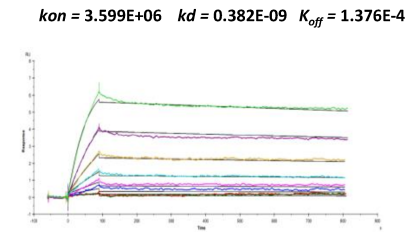

**F Affinity - Mouse VISTA**

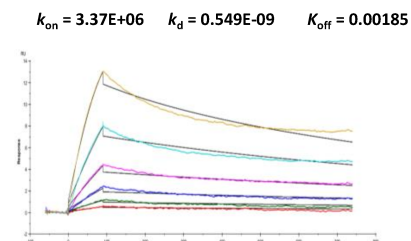

**G Binding of HMBD-002 to VISTA across a pH range**

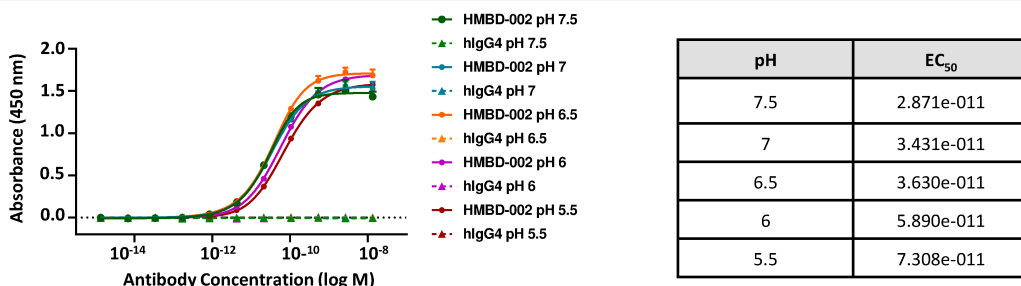

Supplement: jitc-2021-003382supp005.pdf [file jitc-2021-003382supp005.pdf]
