# Supplementary material for: Rationally targeted anti-VISTA antibody that blockades the C-C’ loop region can reverse VISTA immune suppression and remodel the immune microenvironment to potently inhibit tumor growth in an Fc independent manner
Source: PubMed Central journal article supplement — J Immunother Cancer. 2022 Feb 7;10(2):e003382. doi: 10.1136/jitc-2021-003382 (PMC8823246; doi:10.1136/jitc-2021-003382), 2022-02-07

## Pharmacokinetic profile of HMBD-002 in pre-clinical toxicology species

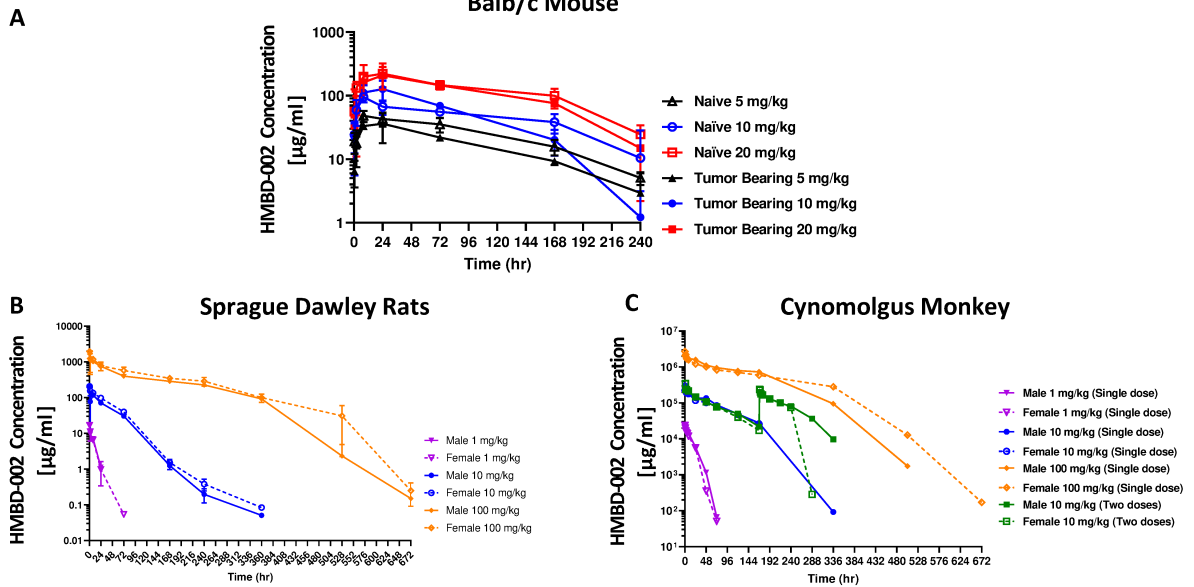Effect of HMBD-002 on an *in vitro* cytokine release assay

## Soluble Treatment Format; n=10 Individual Donors; Whole Blood

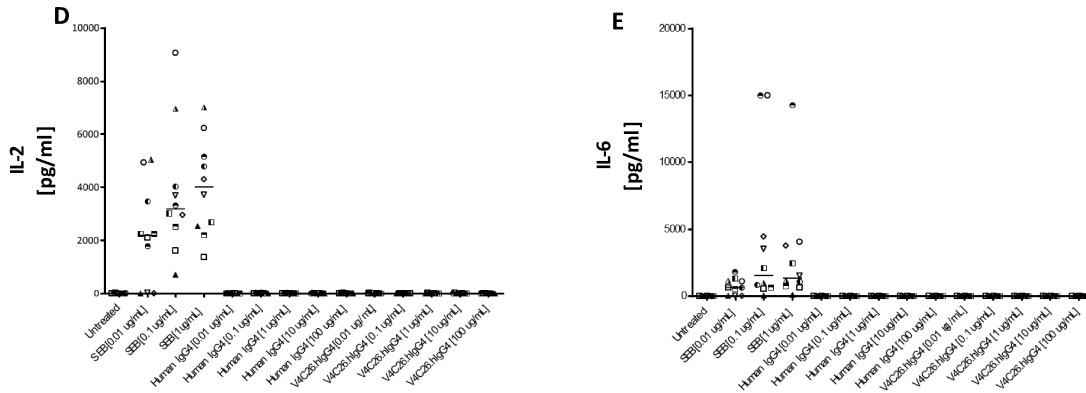

## Soluble Treatment Format; n=10 Individual Donors; PBMC

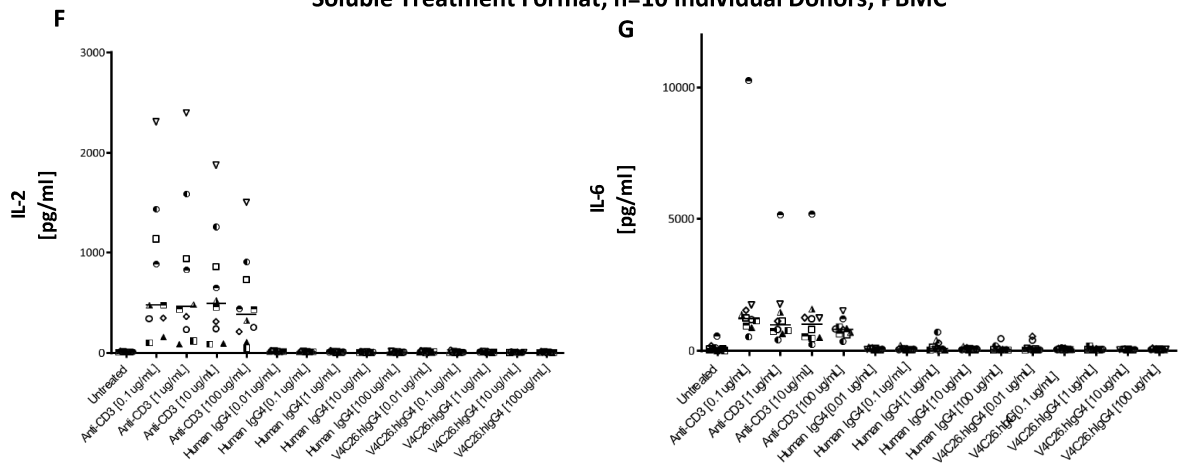

Supplement: jitc-2021-003382supp008.pdf [file jitc-2021-003382supp008.pdf]
