# Supplementary material for: Rationally targeted anti-VISTA antibody that blockades the C-C’ loop region can reverse VISTA immune suppression and remodel the immune microenvironment to potently inhibit tumor growth in an Fc independent manner
Source: PubMed Central journal article supplement — J Immunother Cancer. 2022 Feb 7;10(2):e003382. doi: 10.1136/jitc-2021-003382 (PMC8823246; doi:10.1136/jitc-2021-003382), 2022-02-07
Supplement: jitc-2021-003382supp009.pdf [file jitc-2021-003382supp009.pdf]

**Title: A rationally targeted anti-VISTA antibody that blockades the C-C' loop region can reverse VISTA immune suppression and remodel the immune microenvironment to potently inhibit tumor growth in an Fc independent manner**

**Authors:**

Dipti Thakkar<sup>1</sup>, Shalini Paliwal<sup>1</sup>, Bhushan Dharmadhikari<sup>1</sup>, Siyu Guan<sup>1</sup>, Lillian Liu<sup>1</sup>, Shreya Kar<sup>1</sup>, Nikhil K. Tulsian<sup>2</sup>, Joshua J. Gruber<sup>3</sup>, Leah DiMascio<sup>4</sup>, Konrad H. Paszkiewicz<sup>1</sup>, Piers J. Ingram<sup>4</sup>, and Jerome D. Boyd-Kirkup<sup>4\*</sup>

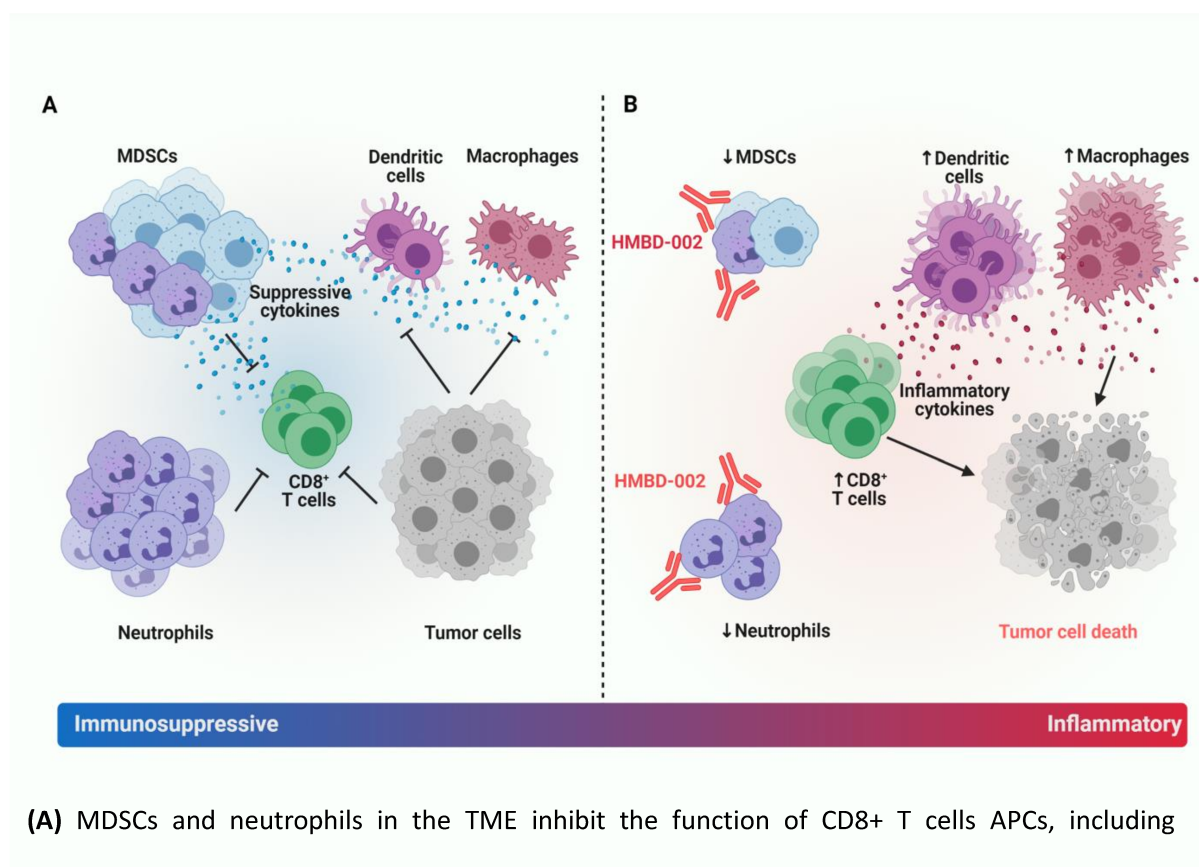

**(A)** MDSCs and neutrophils in the TME inhibit the function of CD8+ T cells APCs, including macrophages and dendritic cells leading to an immunosuppressive TME permissive of tumor growth. **(B)** HMBD-002 binds to and blocks VISTA on neutrophils and MDSCs, releasing their immunosuppressive effects and shifting the TME to a pro-inflammatory anti-tumorigenic phenotype, characterised by increased inflammatory cytokine release and increased proliferation and activation of CD8+ T cells and APCs.
