# Supplementary figures and images for: Rationally targeted anti-VISTA antibody that blockades the C-C’ loop region can reverse VISTA immune suppression and remodel the immune microenvironment to potently inhibit tumor growth in an Fc independent manner
Source: PubMed Central journal article supplement — J Immunother Cancer. 2022 Feb 7;10(2):e003382. doi: 10.1136/jitc-2021-003382 (PMC8823246; doi:10.1136/jitc-2021-003382), 2022-02-07

## Binding of HMBD-002 to FcγRIII and C1q

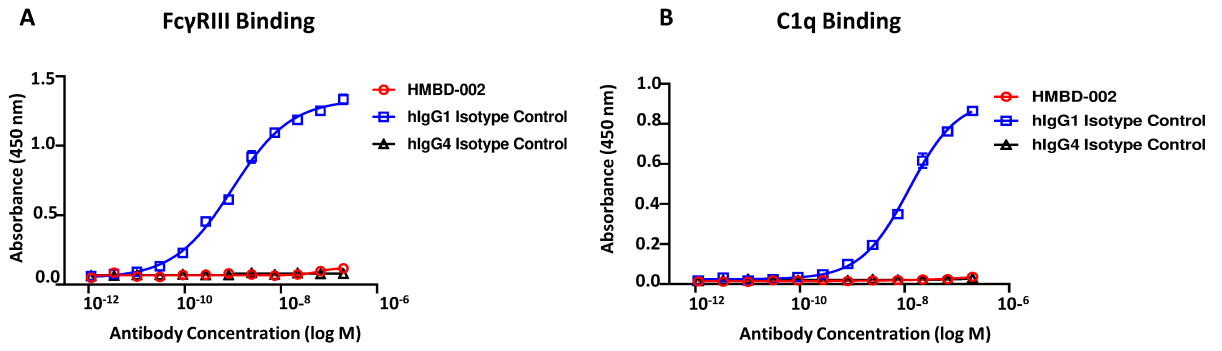

Supplement: jitc-2021-003382supp004.pdf [file jitc-2021-003382supp004.pdf]

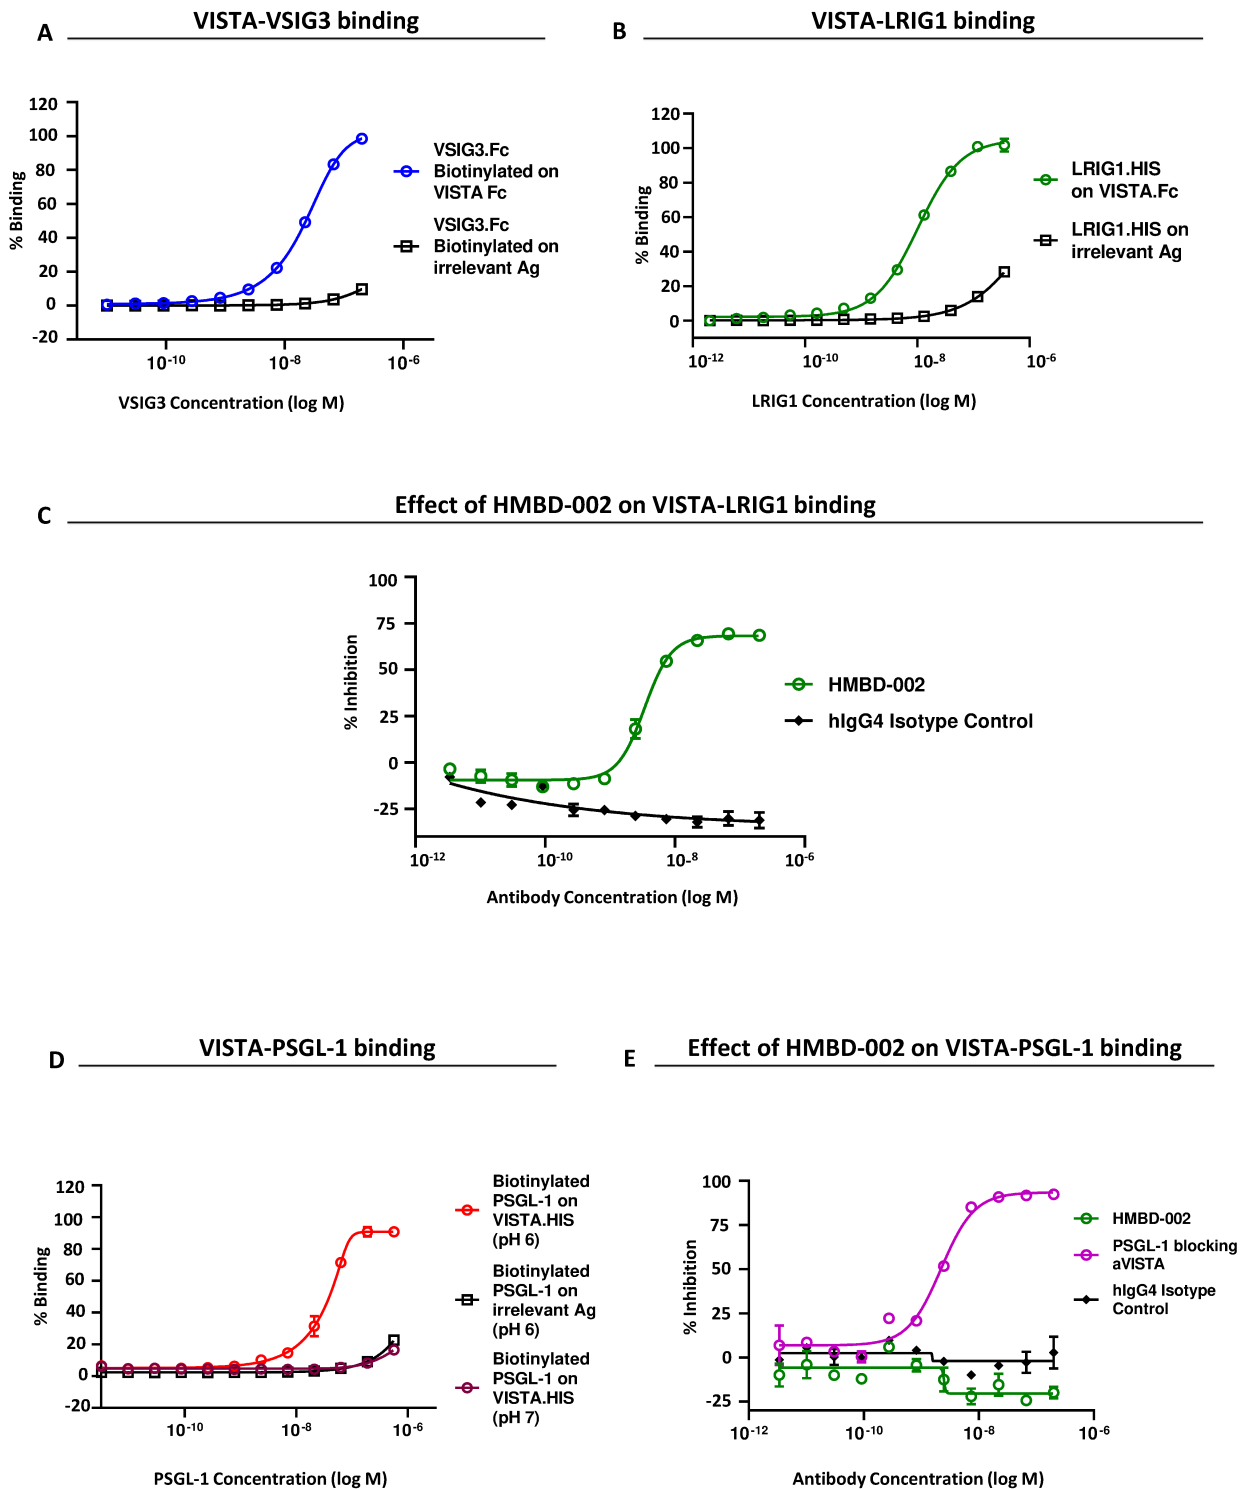

Supplement: jitc-2021-003382supp006.pdf [file jitc-2021-003382supp006.pdf]
